# Supplementary material for: Enterococcus faecalis EF-2001 protects DNBS-induced inflammatory bowel disease in mice model
Source: PLoS One. 2019 Feb 28;14(2):e0210854. doi: 10.1371/journal.pone.0210854 (PMC6394946; doi:10.1371/journal.pone.0210854)
Supplement: S1 File — (XLSX) [file pone.0210854.s001.xlsx]

## Sheet: Sheet1
	initial	final					control	DNBS	1TM	7TM
control	19.85	21.96					20.7443	16.9786	20.9529	21.4157
	19.94	22.01					1.16477	1.76926	0.822734	0.765721
	17.98	19.76
	16.23	20.06
	19.18	21.05
	19.45	21.39	18.4214	20.7443	2.32286	12.6095
	16.32	18.98	1.60174	1.16477
DNBS	16.43	14.75
	19.34	19.39
	19.08	18.41
	18.34	16.05
	19.94	18.56
	18.57	15.75	18.7543	16.9786	-1.77571	-9.46831
	19.58	15.94	1.1651	1.76926
1TM	19.48	21.74
	18.78	20.97
	19.45	21.39
	17.42	19.43
	19.59	21.79
	16.45	20.48	18.57	20.9529	2.38286	12.8318
	18.82	20.87	1.19488	0.822734
7TM	17.63	20.45
	19.79	22.49
	18.97	20.67
	19.88	21.98
	19.49	21.49
	18.43	20.89	19.0729	21.4157	2.34286	12.2837
	19.32	21.94	0.806902	0.765721
